# Supplementary material for: Effects of protein supplementation and exercise on delaying sarcopenia in healthy older individuals in Asian and non-Asian countries: A systematic review and meta-analysis
Source: PubMed Central journal article supplement — Food Chem X. 2022 Jan 20;13:100210. doi: 10.1016/j.fochx.2022.100210 (PMC8808080; doi:10.1016/j.fochx.2022.100210), 2022-01-20
Supplement: mmc1.pdf [file mmc1.pdf]

## Appendix A1

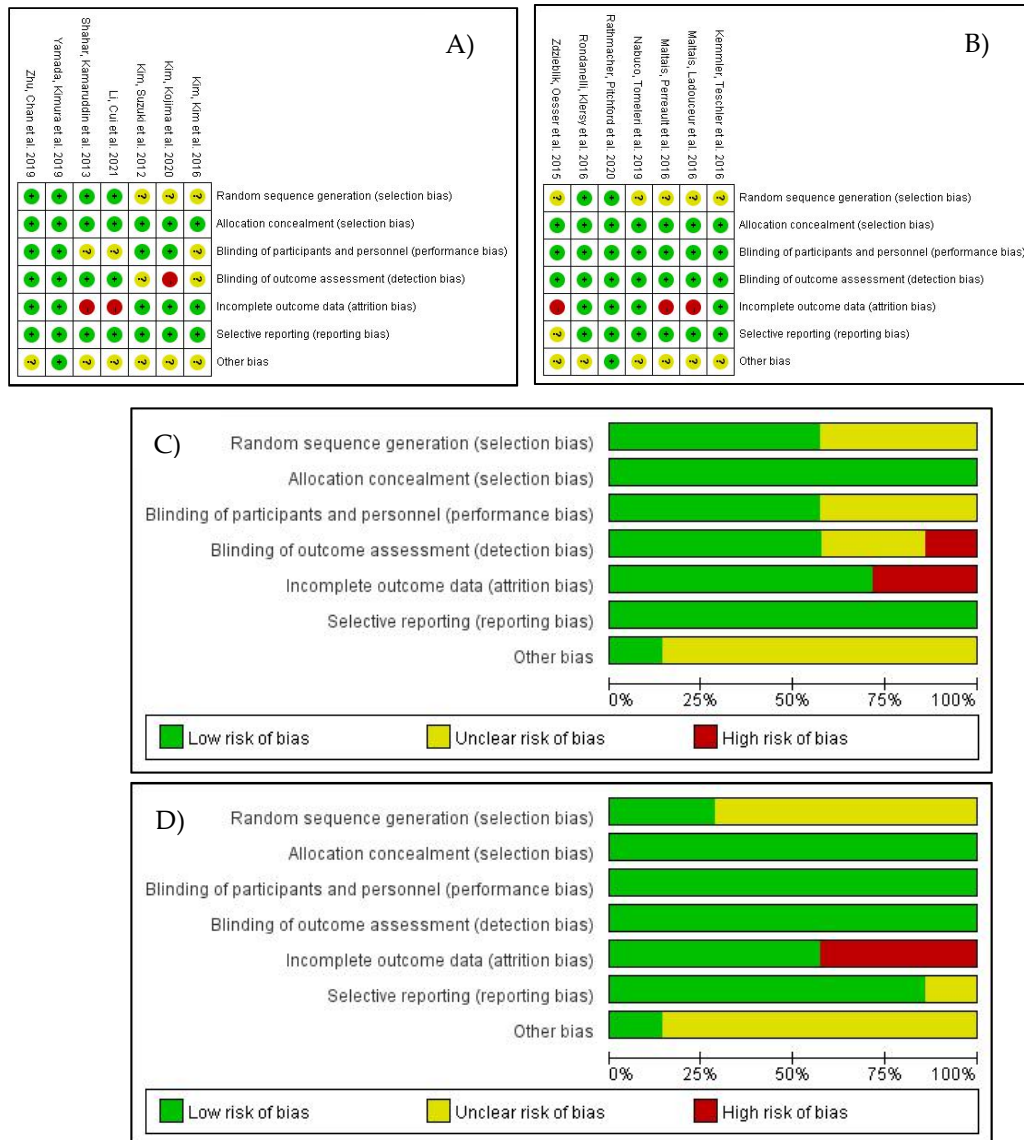

**Figure A1.** Risk of bias summary: A) Asian countries; B) Non-Asian countries. Risk of bias graph: C) Asian countries; D) Non-Asian countries.

## Appendix A2

### 2.1 Upper-extremity strength

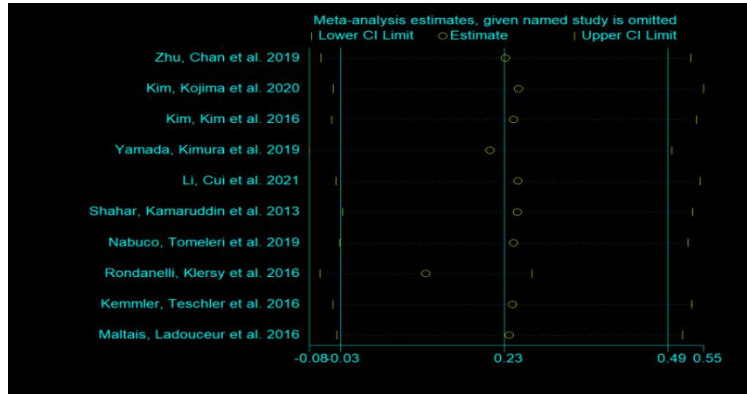

Figure A2.1.1. Sensitivity analysis of upper-extremity strength (Asian and Non-Asian countries)

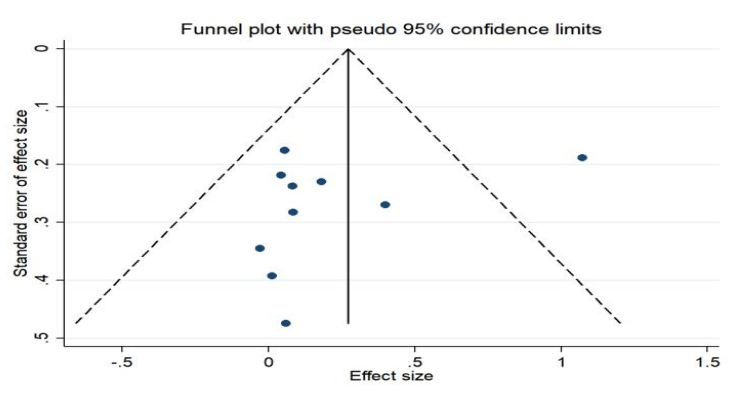

Figure A2.1.2. Funnel plot of upper-extremity strength (Asian and Non-Asian countries)

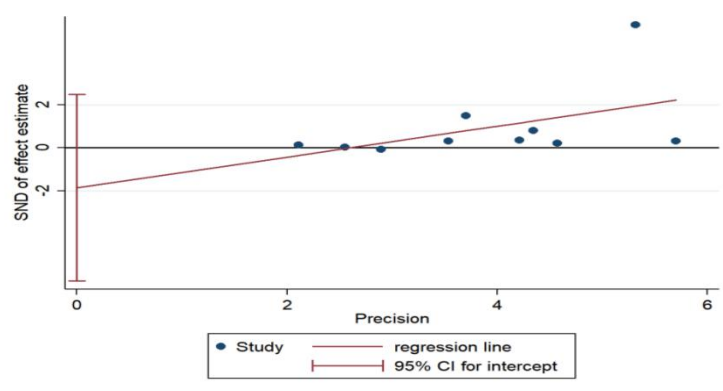

Figure A2.1.3. Egger's regression plots of upper-extremity strength (Asian and Non-Asian countries)

```

. metabias _ES _seES, egger graph
Note: data input format theta se_theta assumed

Egger's test for small-study effects:
Regress standard normal deviate of intervention
effect estimate against its standard error

.
Number of studies = 10                                Root MSE = 1.621

```

| Std_Eff | Coef.     | Std. Err. | t     | P> t  | [95% Conf. Interval] |          |
|---------|-----------|-----------|-------|-------|----------------------|----------|
| slope   | .7136522  | .4640081  | 1.54  | 0.163 | -.3563523            | 1.783657 |
| bias    | -1.856176 | 1.877728  | -0.99 | 0.352 | -6.186224            | 2.473873 |

```

Test of H0: no small-study effects                    P = 0.352

```

**Figure A2.1.4.** Egger's test of upper-extremity strength (Asian and Non-Asian countries)

## 2.2 Upper-extremity strength

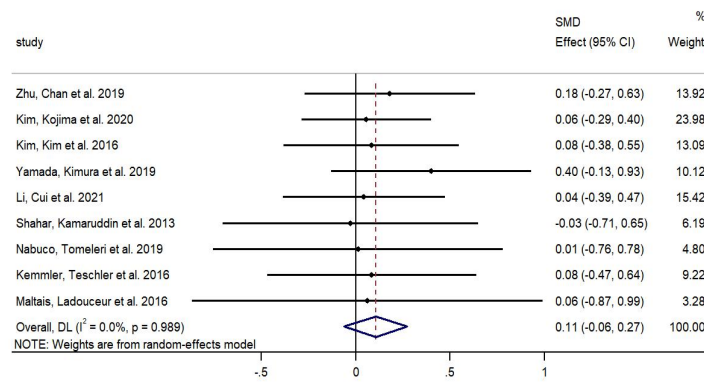

Figure A2.2.1. Forest plots of upper-extremity strength without Rondanelli et al. study (Asian and Non-Asian countries)

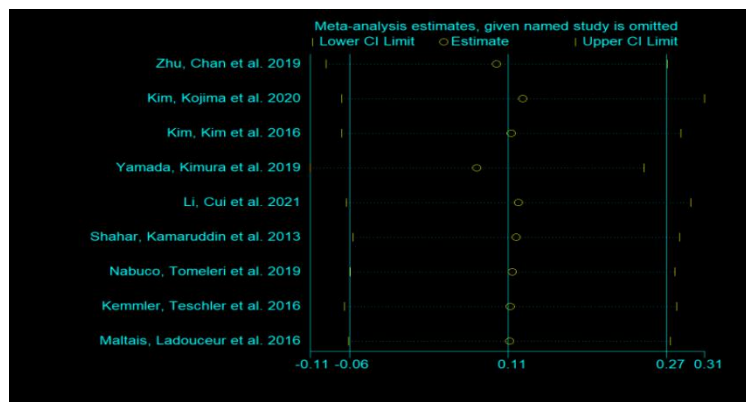

Figure A2.2.2. Sensitivity analysis of upper-extremity strength without Rondanelli et al. study (Asian and Non-Asian countries)

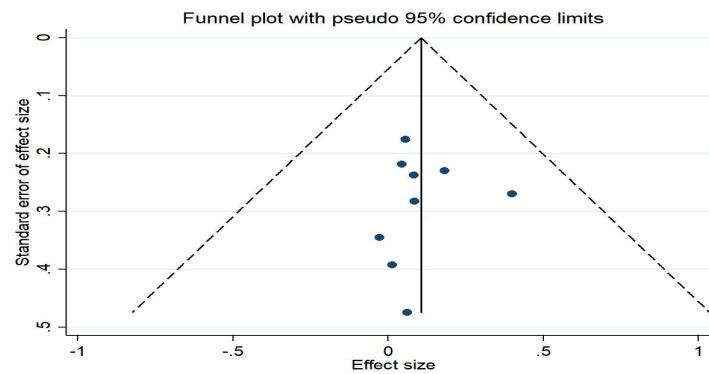

Figure A2.2.3. Funnel plot of upper-extremity strength without Rondanelli et al. Study (Asian and Non-Asian countries)

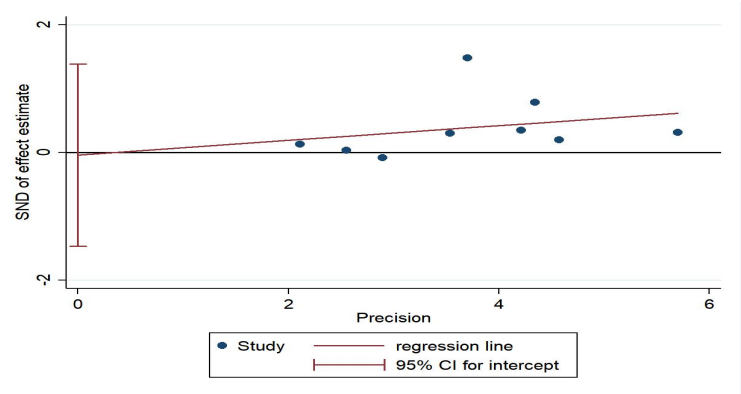

Figure A2.2.4. Egger's regression plots of upper-extremity strength without Rondanelli et al. study (Asian and Non-Asian countries)

```
. metabias _ES_seES, egger graph
Note: data input format theta se_theta assumed

Egger's test for small-study effects:
Regress standard normal deviate of intervention
effect estimate against its standard error

.
Number of studies = 9                                Root MSE = .4911
```

| Std_Eff | Coef.     | Std. Err. | t     | P> t  | [95% Conf. Interval] |          |
|---------|-----------|-----------|-------|-------|----------------------|----------|
| slope   | .1153167  | .1556442  | 0.74  | 0.483 | -.2527235            | .4833568 |
| bias    | -.0400565 | .6039274  | -0.07 | 0.949 | -1.468118            | 1.388005 |

```
Test of H0: no small-study effects                    P = 0.949
```

Figure A2.2.5. Egger's test of upper-extremity strength without Rondanelli et al. study (Asian and Non-Asian countries)

### 2.3 Lower-extremity strength

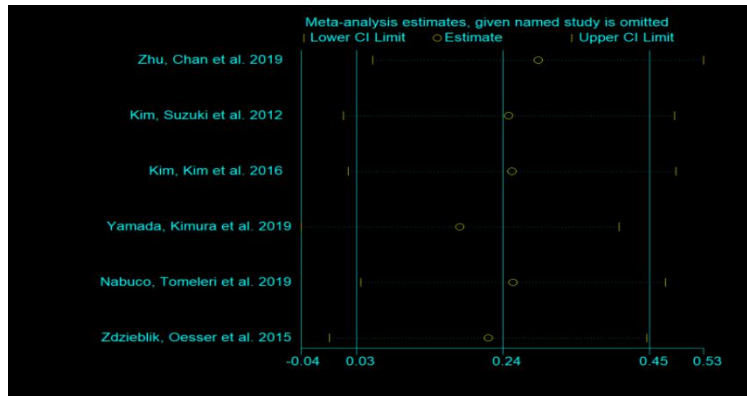

Figure A2.3.1. Sensitivity analysis of lower-extremity strength (Asian and Non-Asian countries)

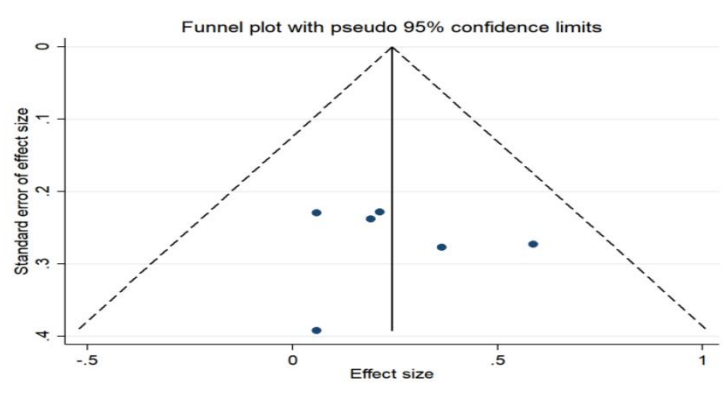

Figure A2.3.2. Funnel plot of lower-extremity strength (Asian and Non-Asian countries)

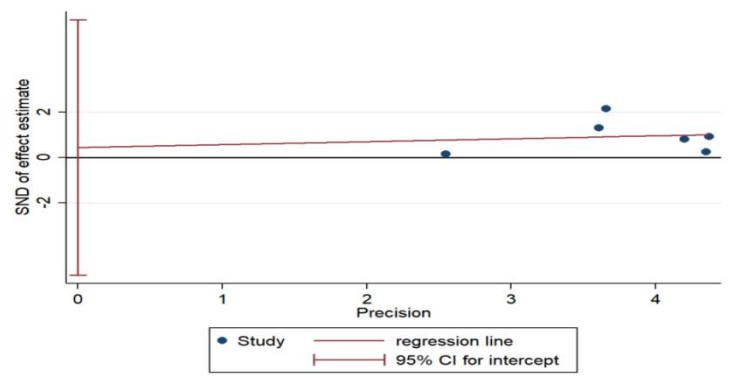

Figure A2.3.3. Egger's regression plots of lower-extremity strength (Asian and Non-Asian countries)

```

. metabias _ES _seES, egger graph
Note: data input format theta se_theta assumed

Egger's test for small-study effects:
Regress standard normal deviate of intervention
effect estimate against its standard error

.
Number of studies = 6                                Root MSE = .818

```

| Std_Eff | Coef.    | Std. Err. | t    | P> t  | [95% Conf. Interval] |          |
|---------|----------|-----------|------|-------|----------------------|----------|
| slope   | .1288897 | .5261226  | 0.24 | 0.819 | -1.331861            | 1.58964  |
| bias    | .4447049 | 2.02241   | 0.22 | 0.837 | -5.170405            | 6.059815 |

```

Test of H0: no small-study effects                    P = 0.837

```

**Figure A2.3.4.** Egger's test of lower-extremity strength (Asian and Non-Asian countries)





## 2.5 Gait speed

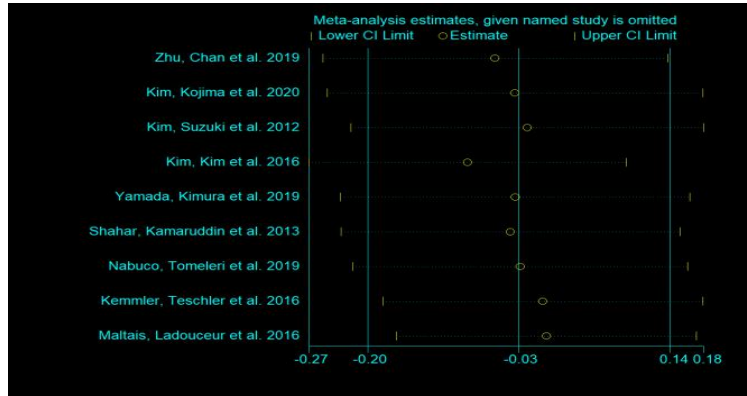

Figure A2.5.1. Sensitivity analysis of gait speed (Asian and Non-Asian countries)

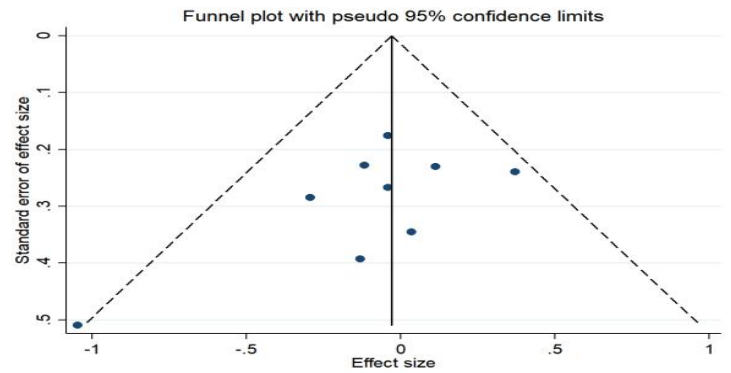

Figure A2.5.2. Funnel plot of gait speed (Asian and Non-Asian countries)

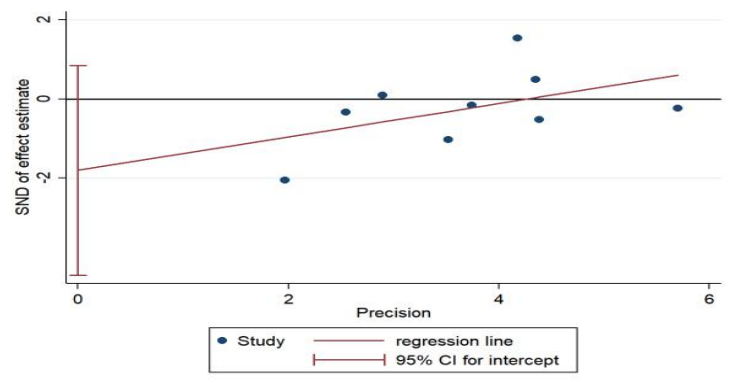

Figure A2.5.3. Egger's regression plots of gait speed (Asian and Non-Asian countries)

```
. metabias _ES _seES, egger graph
Note: data input format theta se_theta assumed
Egger's test for small-study effects:
Regress standard normal deviate of intervention
effect estimate against its standard error
.
Number of studies = 9                                Root MSE = .9291
```

|       | Std_Eff | Coef.     | Std. Err. | t     | P> t  | [95% Conf. Interval] |
|-------|---------|-----------|-----------|-------|-------|----------------------|
| slope |         | .4224439  | .2917403  | 1.45  | 0.191 | -.2674123 1.1123     |
| bias  |         | -1.805281 | 1.122108  | -1.61 | 0.152 | -4.458644 .8480829   |

```
Test of H0: no small-study effects                    P = 0.152
```

Figure A2.5.4. Egger's test of gait speed (Asian and Non-Asian countries)

## Appendix A3

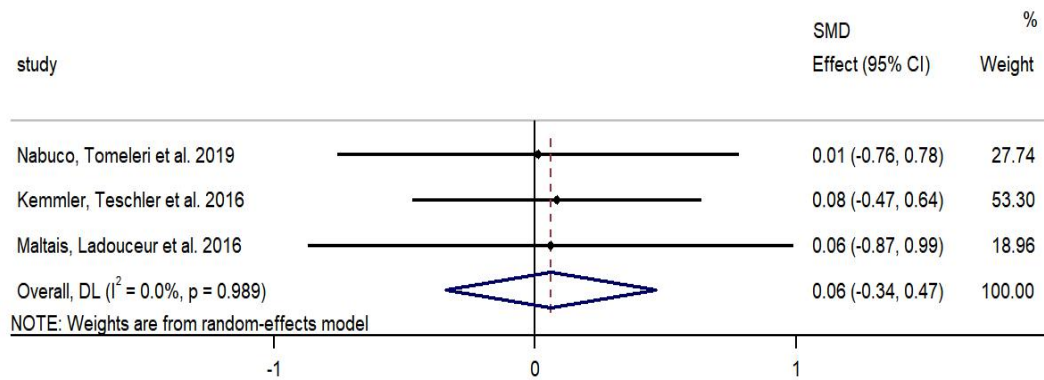

**Figure A3.1.** Forest plots of upper-extremity strength without Rondanelli et al. study: Non-Asian countries.

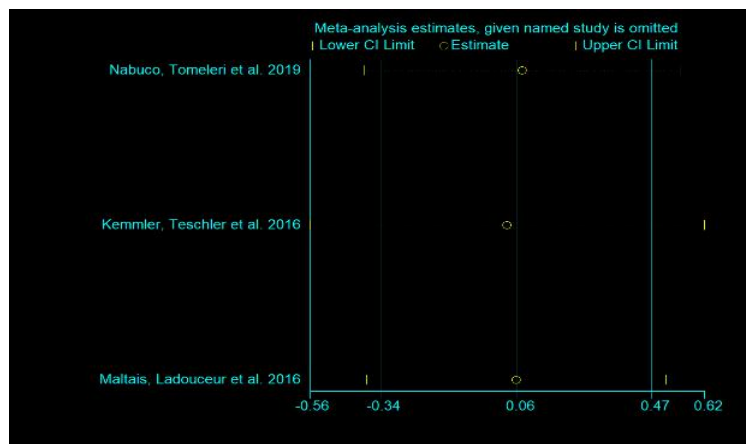

**Figure A3.2.** Sensitivity analysis of upper-extremity strength without Rondanelli et al. study: Non-Asian countries.

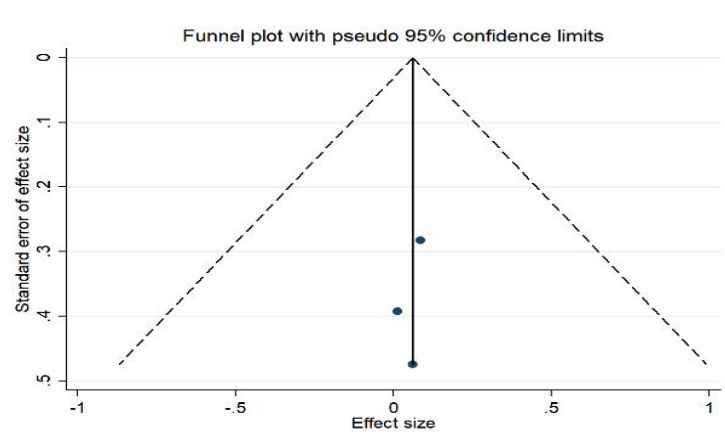

**Figure A3.3.** Funnel plot of upper-extremity strength without Rondanelli et al. study: Non-Asian countries.

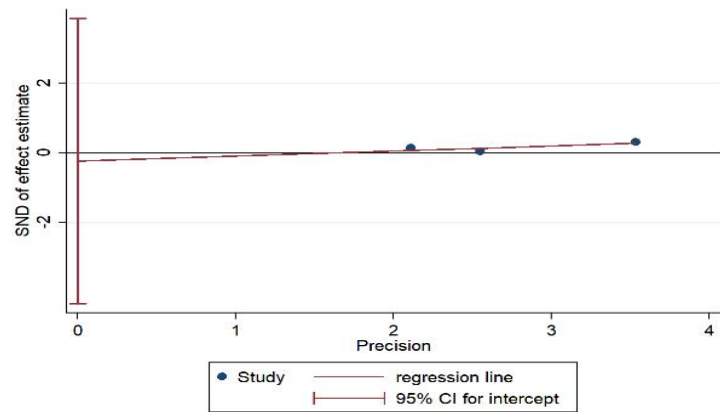

**Figure A3.4.** Egger's regression plots of upper-extremity strength without Rondanelli et al. study: Non-Asian countries.

```
. metabias _ES _seES, egger graph

Note: data input format theta se_theta assumed

Egger's test for small-study effects:
Regress standard normal deviate of intervention
effect estimate against its standard error

.
Number of studies = 3                               Root MSE = .1189
```

| Std_Eff | Coef.     | Std. Err. | t     | P> t  | [95% Conf. Interval] |          |
|---------|-----------|-----------|-------|-------|----------------------|----------|
| slope   | .1453098  | .1151323  | 1.26  | 0.427 | -1.317584            | 1.608204 |
| bias    | -.2430976 | .321755   | -0.76 | 0.588 | -4.331383            | 3.845188 |

```
Test of H0: no small-study effects                P = 0.588
```

**Figure A3.5.** Egger's test of upper-extremity strength without Rondanelli et al. study: Non-Asian countries.

## Appendix A4

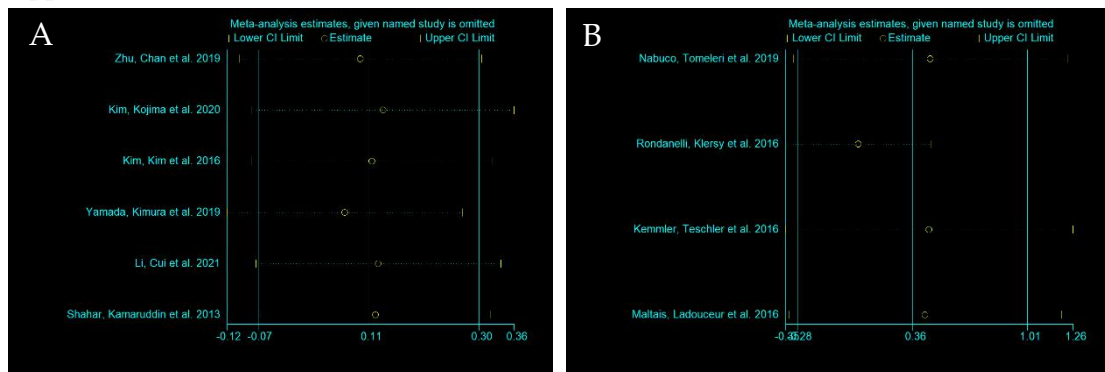

**Figure A4.1.** Sensitivity analysis of upper-extremity strength: A) Asian countries; B) Non-Asian countries.

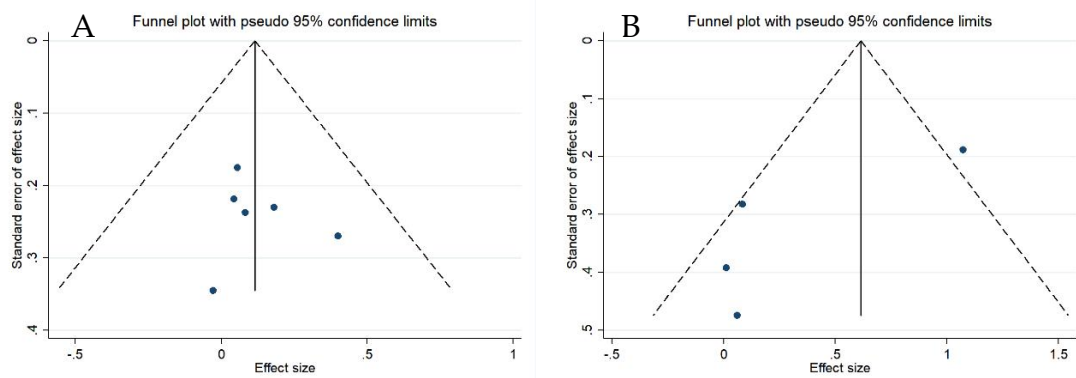

**Figure A4.2.** Funnel plot of upper-extremity strength: A) Asian countries; B) Non-Asian countries.

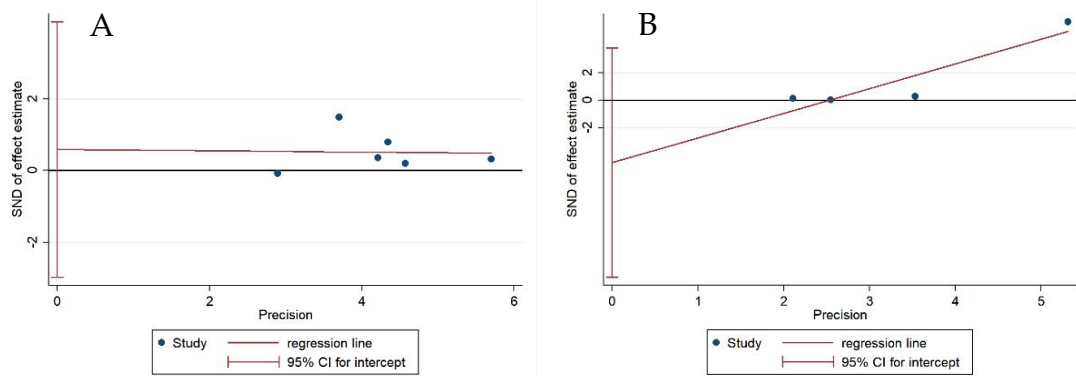

**Figure A4.3.** Egger's regression plots of upper-extremity strength A) Asian countries; B) Non-Asian countries.

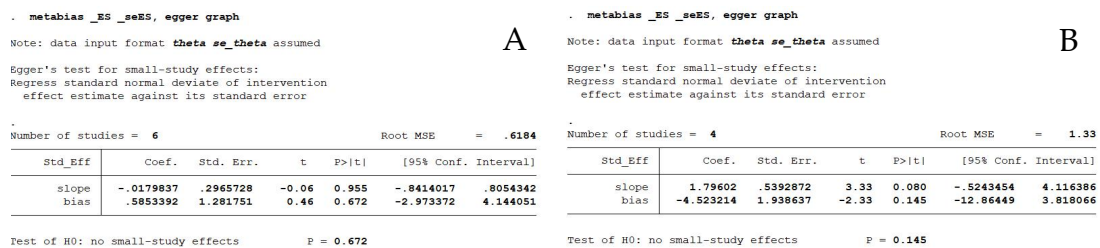

**Figure A4.4.** Egger's test of upper-extremity strength: A) Asian countries; B) Non-Asian countries.

Appendix A5

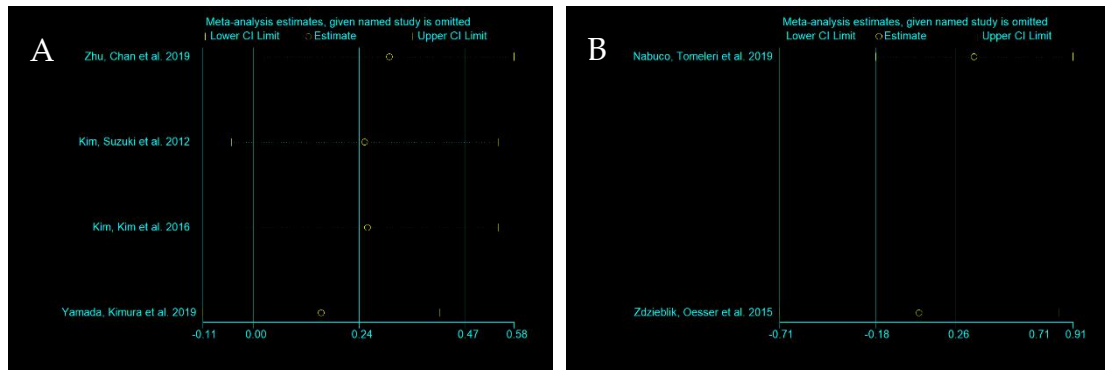

Figure A5.1. Sensitivity analysis of lower-extremity strength: A) Asian countries; B) Non-Asian countries.

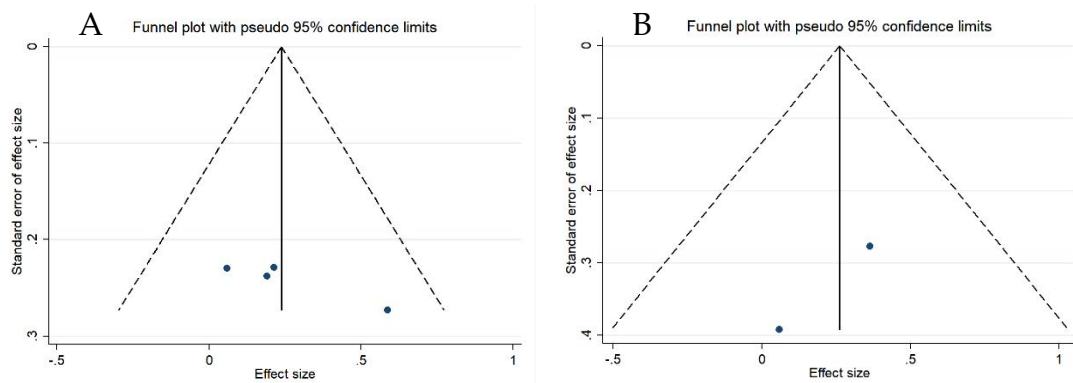

Figure A5.2. Funnel plot of lower-extremity strength: A) Asian countries; B) Non-Asian countries.

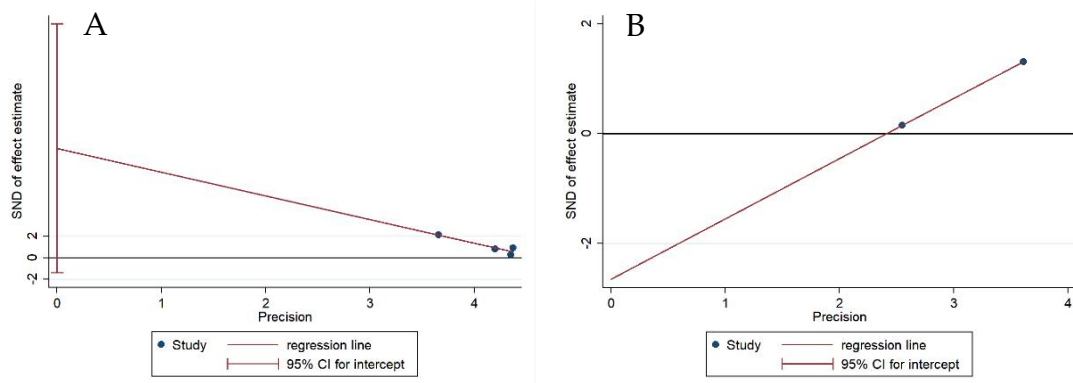

Figure A5.3. Egger's regression plots of lower-extremity strength: A) Asian countries; B) Non-Asian countries.

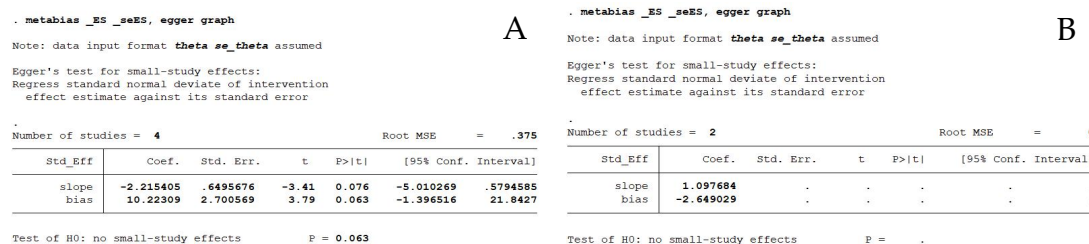

Figure A5.4. Egger's test of lower-extremity strength: A) Asian countries; B) Non-Asian countries.

## Appendix A6

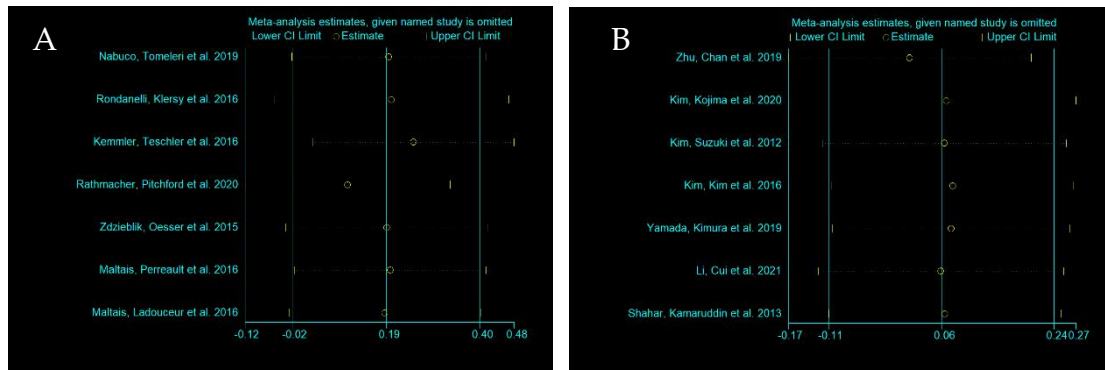

Figure A6.1. Sensitivity analysis of muscle mass: A) Asian countries; B) Non-Asian countries.

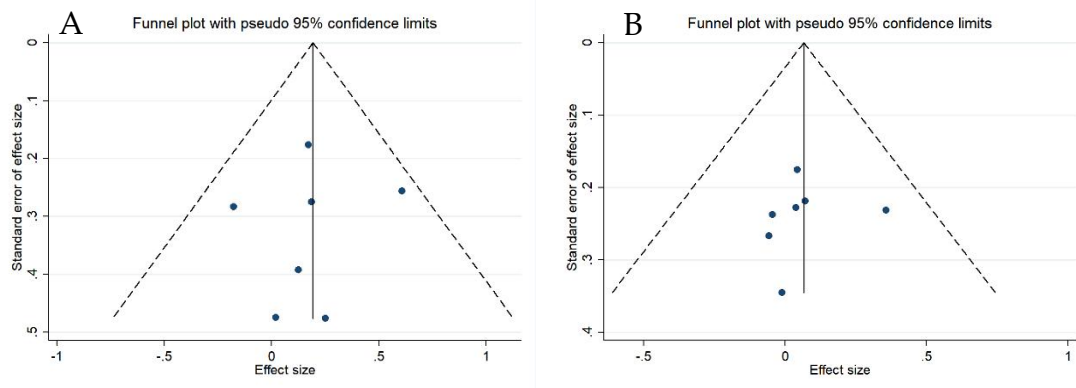

Figure A6.2. Funnel plot of muscle mass: A) Asian countries; B) Non-Asian countries.

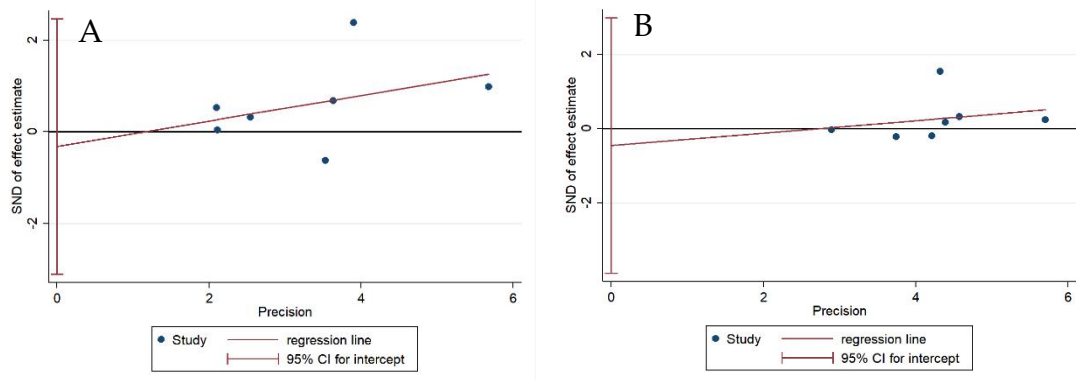

Figure A6.3. Egger's regression plots of muscle mass: A) Asian countries; B) Non-Asian countries.

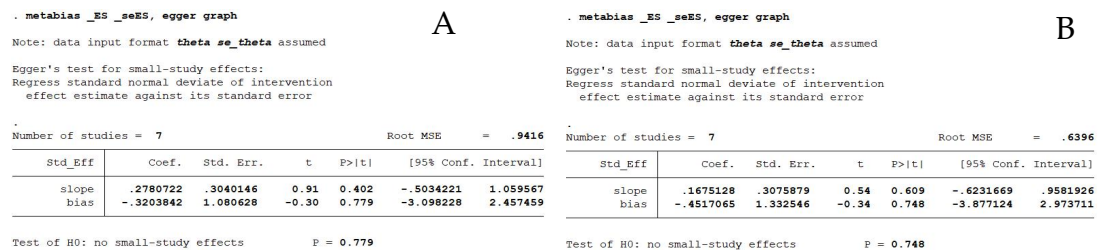

Figure A6.4. Egger's test of muscle mass: A) Asian countries; B) Non-Asian countries.

## Appendix A7

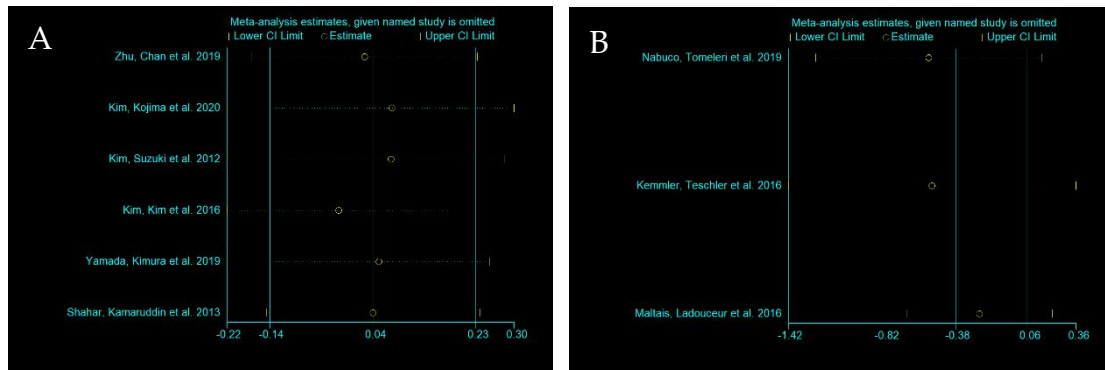

Figure A7.1. Sensitivity analysis of gait speed: A) Asian countries; B) Non-Asian countries.

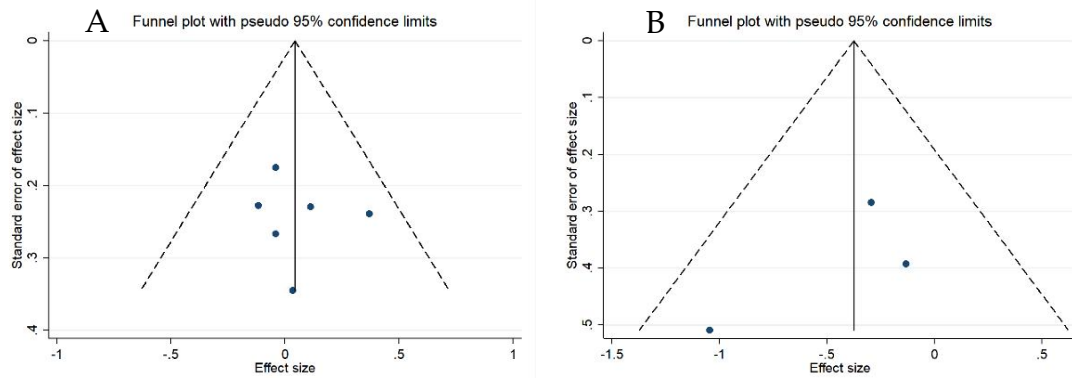

Figure A7.2. Funnel plot of gait speed: A) Asian countries; B) Non-Asian countries.

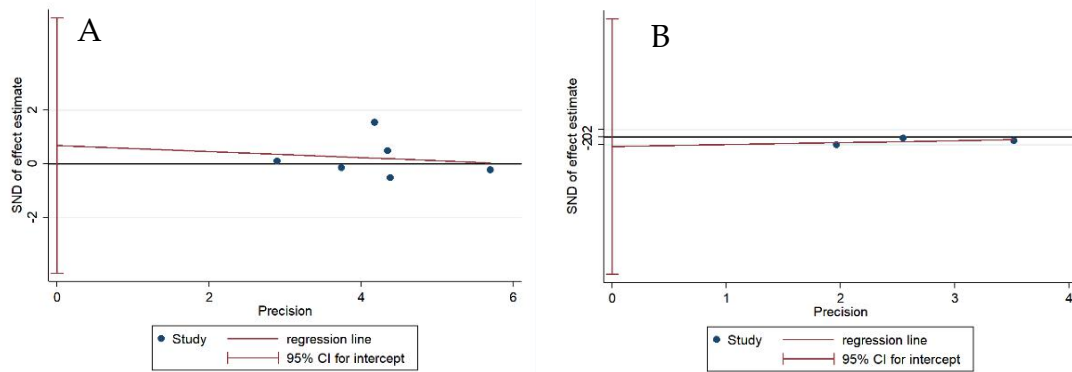

Figure A7.3. Egger's regression plots of gait speed: A) Asian countries; B) Non-Asian countries.

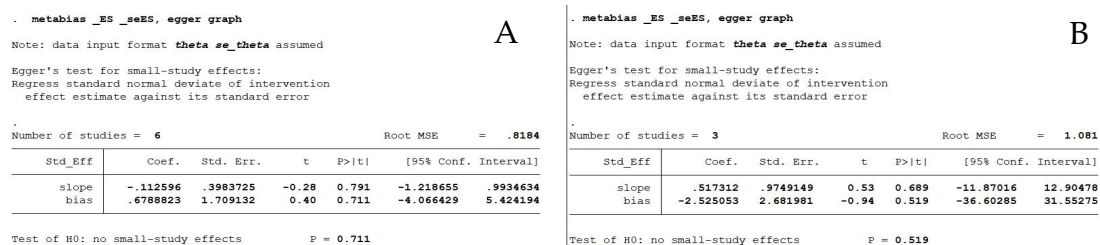

Figure A7.4. Egger's test of gait speed: A) Asian countries; B) Non-Asian countries.
